# Supplementary material for: Triangulating Evidence, Expertise, and Maternal Experience to Design a Gestational Age- Specific Early Stimulation Protocol for Preterm Infants in Neonatal Intensive Care Unit: A Contextual Multi-Source Framework from India with LMIC Relevance
Source: Research Square preprint supplement (doi:10.21203/rs.3.rs-7305154/v1), 2025-09-24
Supplement: Supplementary file 1 [file 5311604601d1c2af6153932c.docx]

Supplementary file

**TABEL 1 : INTERVENTION-MODALITY MAPPING (from the review)**

| **Intervention** | **26–27** | **28–31** | **32–34** | **35–37** | **38–40** | **Delivery** |
| --- | --- | --- | --- | --- | --- | --- |
| Positioning | ✖ | ✔ | ✔ | ✔ | ✔ | Therapist initially, then parent |
| Skin-to-Skin Care (KMC) | ✔ | ✔ | ✔ | ✔ | ✔ | Parent-led with therapist support |
| Tactile-Kinesthetic | ✔ | ✔ | ✔ | ✔ | ✔ | Therapist → parent transition |
| Reflex Locomotion Therapy | ✖ | ✔ | ✔ | ✔ | ✖ | Therapist only |
| Oromotor Stimulation | ✖ | ✔ | ✔ | ✔ | ✔ | Therapist initially, then parent |
| Olfactory | ✖ | ✔ | ✔ | ✔ | ✔ | Parent-led |
| Visual | ✖ | ✖ | ✖ | ✔ | ✔ | Parent-led |
| Gustatory | ✖ | ✖ | ✔ | ✔ | ✔ | Parent-led |
| Multisensory (layered) | ✔ | ✔ | ✔ | ✔ | ✔ | Combined, introduced gradually |

**Table 2: SYNTHESIS OF THERAPIST-INFORMED PRACTICES**

| **Modality/Domain** | **Therapist-Informed Practice** | **Feasibility/Role** | **Special Notes** |
| --- | --- | --- | --- |
| **Tactile Stimulation** | Yakson touch, gentle massage with bare hands | Therapist-led (early GA); can train mothers later | Considered safe even in ventilated infants |
| **Auditory Stimulation** | Prefer mother's voice over music due to NICU noise | Mother-led | Enhances bonding; constant even during KMC |
| **Olfactory Stimulation** | Mother’s scent via cloth or breastmilk near baby | Mother-led | Enhances maternal bonding, used even when not held |
| **Visual Stimulation** | High-contrast cards used cautiously; face regard preferred for overstimulated infants | Introduced later (~32 weeks+); mother-supervised | Must avoid overstimulation in early weeks |
| **Vestibular Stimulation** | Gentle rocking during KMC or nesting; limited active use by therapists | Mother-supervised or passive | Used informally, not protocol-based |
| **Proprioceptive/PNF** | Intercostal stretch, basal lift, perioral pressure, abdominal co-contraction | Therapist-only | Applied from ~28 weeks onward if medically stable |
| **Chest Physiotherapy** | Thoracic squeeze, vertebral pressure, prolonged expiratory phase – highly cautious | Therapist-only; >28 weeks GA | Initiated post-stabilization; requires monitoring; no protocols but practiced |
| **Positioning** | Prone/side-lying taught to parents | Therapist guides; parent practices | Supports oxygenation and comfort |
| **Nesting/Swaddling** | Simulates womb; shown to calm babies; reduces sensory stress | Parent-led after training | Reinforced for both posture and emotional containment |
| **Kangaroo Care (KMC)** | Universal benefit recognized; encouraged from early GA | Mother-led with therapist support | Seen as both physiological and emotional intervention |
| **Environmental Regulation** | NICU noise/light reduced; light-dark cycles encouraged | Team effort | Avoids overstimulation and supports circadian rhythms |
| **Readiness Criteria** | 72-hr medical stability rule; hygiene emphasized before stimulation | Therapists assess readiness before starting | Therapists hesitant to intervene if cues not right |
| **Observation and Safety** | Stress cues (grimacing, fisting, HR↑) dictate pauses or stoppage | Therapists and parents jointly observe | Part of all sensory interventions |
| **Maternal Education** | Parents taught infant cues, stimulation basics, and equipment use | Therapist-led; empowers mother | Increases mother confidence and participation |

**Table 3: SYNTHESIS: MATERNAL READINESS FINDINGS BY MODALITY**

| **Modality** | **Readiness Indicators** | **Confidence** | **Barriers** |
| --- | --- | --- | --- |
| **Nesting/Positioning** | High willingness to learn; already involved in basic care (e.g., diapering) | High (post-training) | None reported |
| **KMC (Skin-to-skin)** | Strong emotional attachment; widely practiced; mothers find it empowering | Very High | Mild physical discomfort (back/shoulder ache) |
| **Tactile (Yakson)** | Interest expressed in learning massage/kinaesthetic care but not aware it exists in NICU | Moderate (trainable) | Not aware of early stimulation techniques |
| **Tactile-Kinesthetic** | Some mothers gently moved limbs or interacted physically during care | Moderate | Lack of knowledge on purpose/formality |
| **Oromotor/Gustatory** | Sought guidance on feeding and sucking; emotional response to first suck/smile | High willingness | Need stepwise training; initial fear reported |
| **Auditory (Voice)** | Universally practiced; mothers talk and sing to babies frequently during care | Very High | None |
| **Visual (Face regard)** | Mothers make eye contact, smile; unaware of visual cue stimulation | High natural instinct | No structured awareness |
| **Vestibular (KMC rocking)** | Reported movement during KMC or gentle cradle motion | High informal use | No knowledge of "vestibular stimulation" per se |
| **Respiratory PNF** | Not known to mothers | Not applicable | Specialist-only intervention |
| **Reflex locomotion** | Unknown to mothers | Not applicable | Specialist-only; no awareness |
| **Environmental regulation** | Understood cleanliness, noise management; learned from nurses | Moderate | Needs reinforcement |
| **Peer Support** | Highly valued; mothers learned caregiving tips (e.g., lifting, feeding) from peers | Socially reinforced | None |
